# Supplementary material for: Photo-activated autophagy-associated tumour cell death by lysosome impairment based on manganese-doped graphene quantum dots
Source: Royal Society of Chemistry journal article supplement (doi:10.1039/d2tb02761e), 2023-01-01
Supplement: d2tb02761e1.pdf [file d2tb02761e1.pdf]

## Supporting Information

### **Photo-activated autophagy-associated tumor cell death by lysosome impairment based on manganese-doped graphene quantum dots**

Qingjing Liang,<sup>#a</sup> Feng Yu,<sup>#a</sup> Hao Cai,<sup>b</sup> Xiaoyan Wu,<sup>b</sup> Menghui Ma,<sup>a</sup> Zijian Li,<sup>\*b</sup> Antonio Claudio Tedesco,<sup>ac</sup> Junfa Zhu,<sup>d</sup> Qian Xu,<sup>d</sup> Hong Bi<sup>\*b</sup>

<sup>a</sup> *School of Chemistry and Chemical Engineering, Anhui University, Hefei 230601, China.*

<sup>b</sup> *School of Materials Science and Engineering, Anhui University, Hefei 230601, China.*

<sup>c</sup> *Department of Chemistry, Center of Nanotechnology and Tissue Engineering-Photobiology and Photomedicine Research Group, Faculty of Philosophy, Sciences and Letters of Ribeirão Preto, University of São Paulo, Ribeirão Preto, São Paulo 14040-901, Brazil. National Synchrotron Radiation Laboratory, University of Science and Technology of China, Hefei, Anhui 230029, China.*

<sup>d</sup> *National Synchrotron Radiation Laboratory, University of Science and Technology of China, Hefei, Anhui 230029, China.*

\*E-mail: [bihong@ahu.edu.cn](mailto:bihong@ahu.edu.cn); [22018@ahu.edu.cn](mailto:22018@ahu.edu.cn)

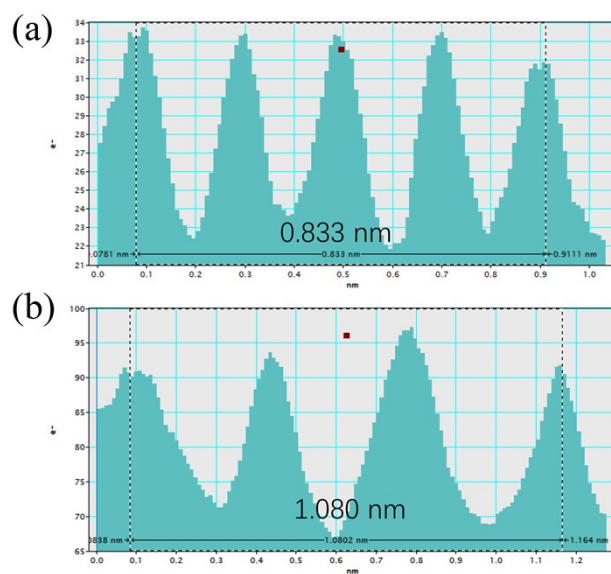

**Figure S1.** Line profile of diffraction fringes for the (a) FGQDs and (b) Mn-FGQDs.

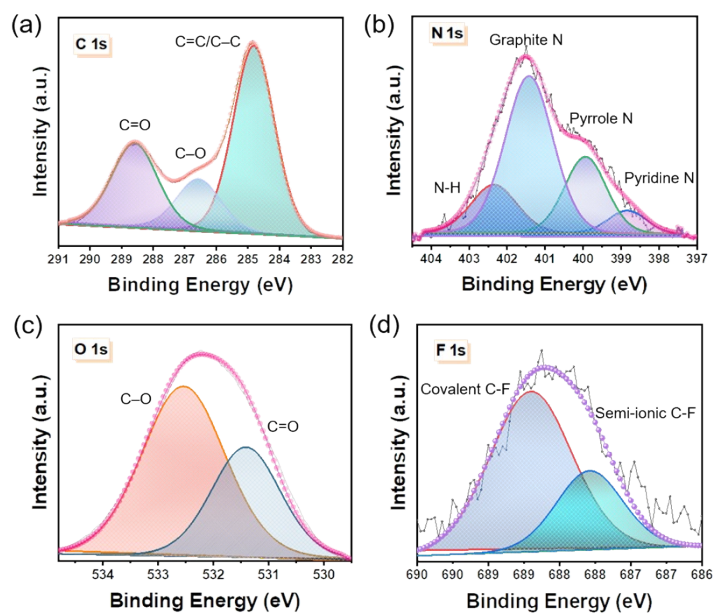

**Figure S2.** The high-resolution (a) C 1s, (b) N 1s, (c) O 1s and (d) F 1s spectra of FGQDs.

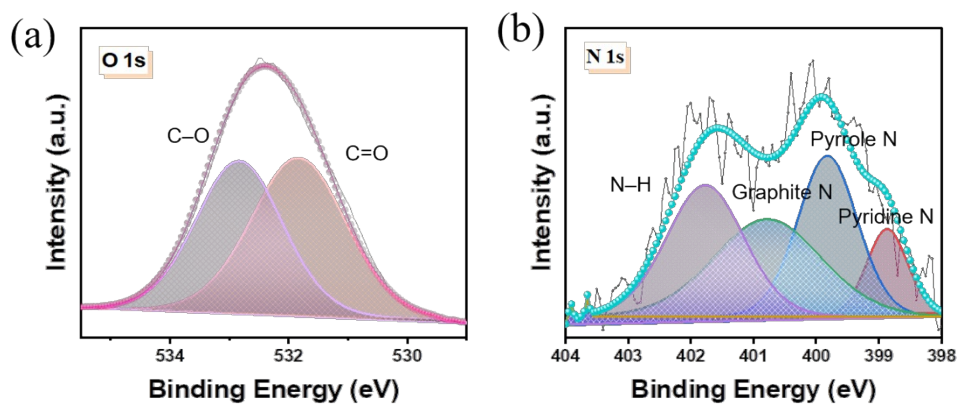

**Figure S3.** The high-resolution (a) O 1s and (b) N 1s spectra of Mn-FGQDs.

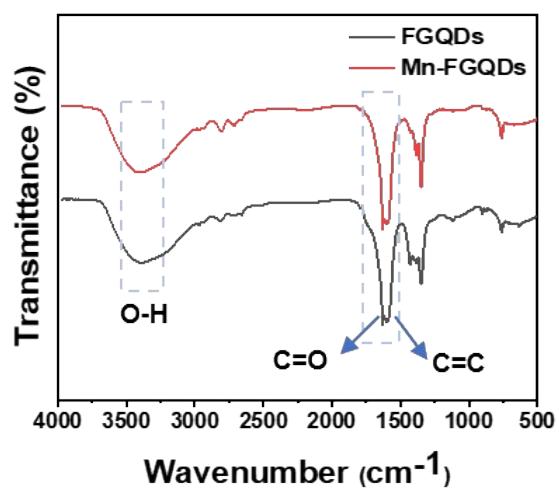

**Figure S4.** Fourier transform infrared spectra of FGQDs and Mn-FGQDs.

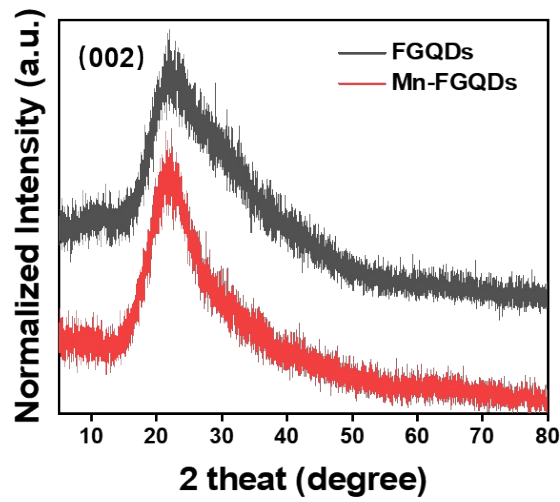

**Figure S5.** The XRD patterns of FGQDs and Mn-FGQDs powder.

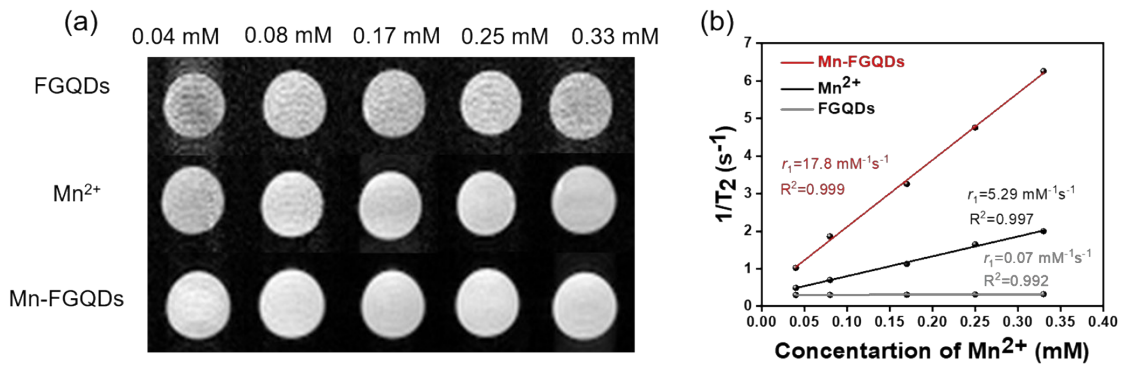

**Figure S6.**  $T_1$ -weighted MRI images (a) and  $r_1$  relaxation rate images (b) of Mn-FGQDs,  $Mn^{2+}$ , and FGQDs.

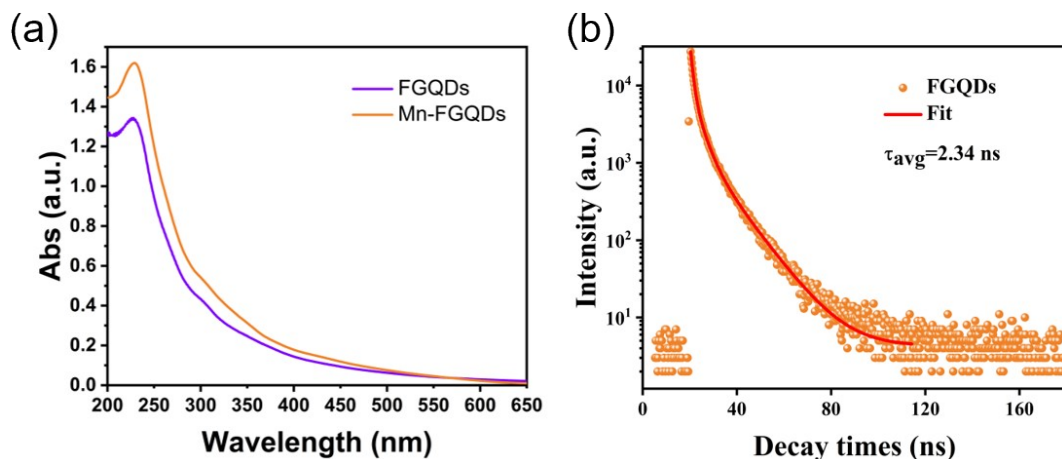

**Figure S7.** (a) UV-vis absorption spectra of the FGQD and Mn-FGQDs. (b) Fluorescence decay spectra of FGQDs.

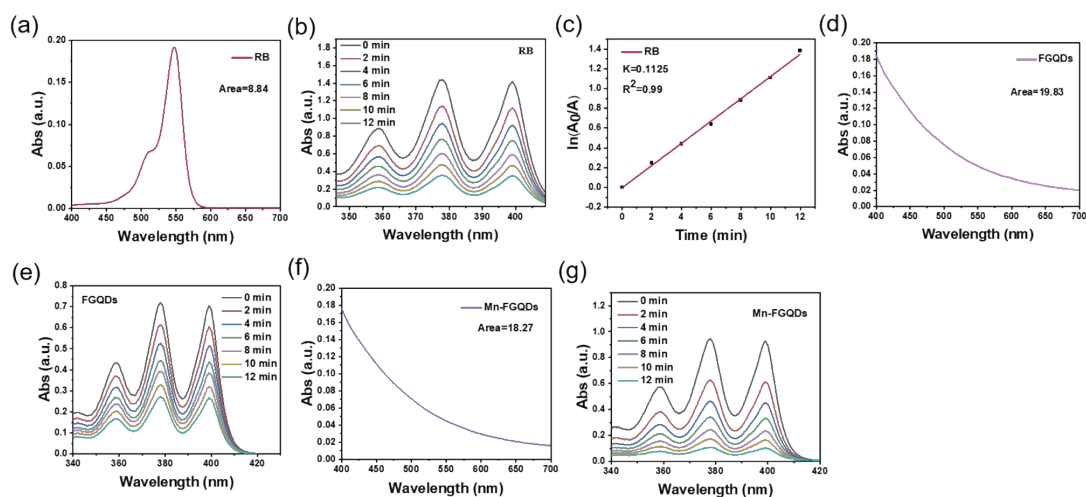

**Figure S8.** UV-vis absorption spectra of (a) RB, (d) FGQDs, and (f) Mn-FGQDs. The UV-vis absorption spectra of ABDA decomposed by (b) RB, (e) FGQDs, and (g) Mn-FGQDs at different LED lamp irradiation times. Decomposition rate constants of ABDA by (c) RB.

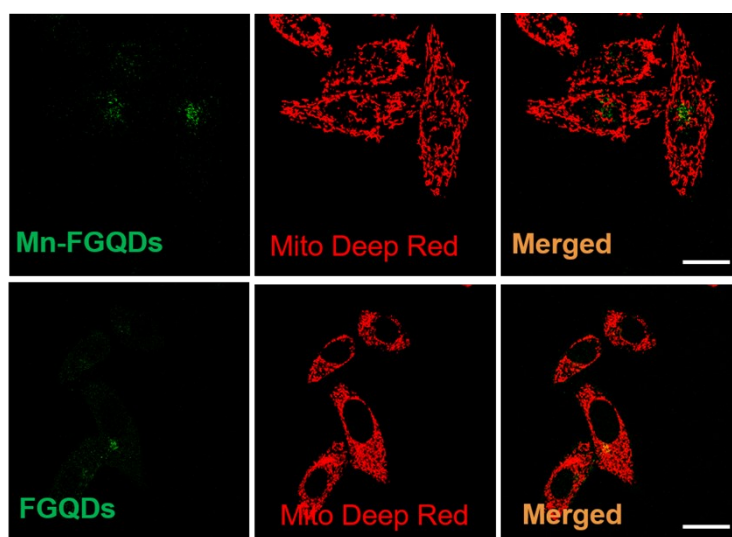

**Figure S9.** Confocal fluorescence images of HepG2 cells stained by Mito-Deep Red tracker after incubation with FGQDs and Mn-FGQDs ( $200 \mu\text{g mL}^{-1}$ ) for 4 h, respectively. Scale bar =  $30 \mu\text{m}$ .

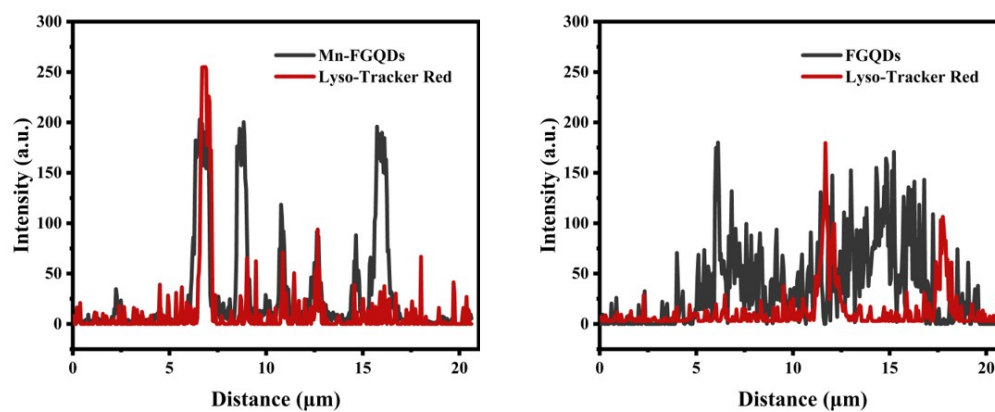

**Figure S10.** The fluorescence intensity curve between the green and red channels in HepG2 cells.

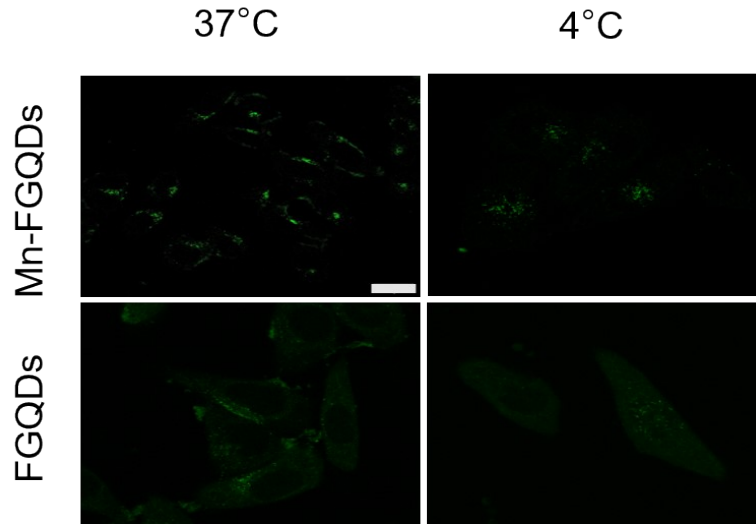

**Figure S11.** Confocal fluorescence images of HepG2 cells incubated at 37°C or 4°C and then treated with FGQDs or Mn-FGQDs for 4 h. Scale bar = 20  $\mu\text{m}$ .

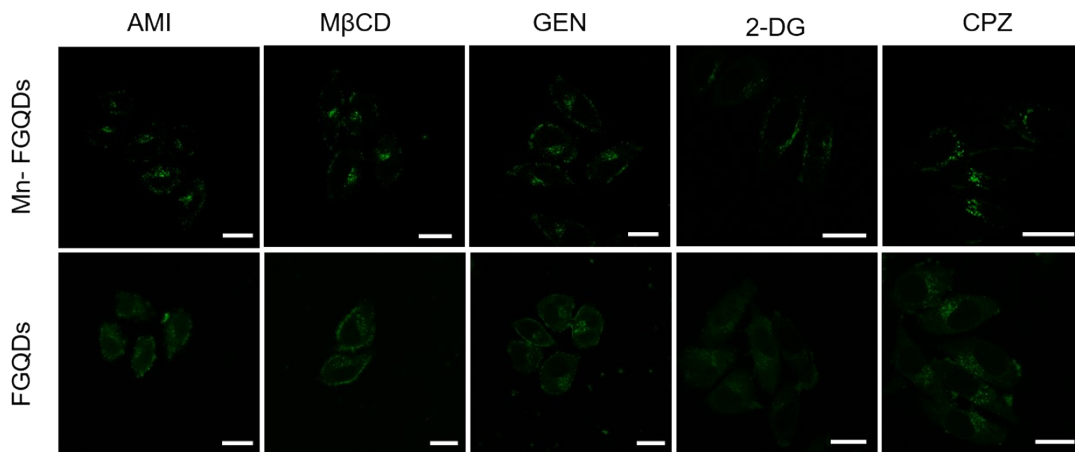

**Figure S12.** Fluorescence images of HepG2 cells incubated with the FGQDs and Mn-FGQDs in the presence of different endocytosis inhibitors such as AMI, M $\beta$ CD, GEN, 2-DG, and CPZ. Scale bar = 20  $\mu\text{m}$ .

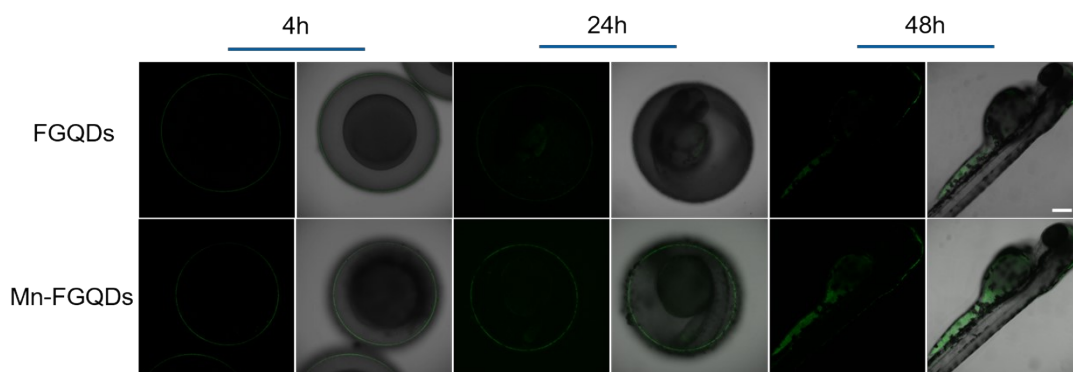

**Figure S13.** CLSM images of zebrafish embryos and juveniles at different incubation times. Scale bar = 200  $\mu\text{m}$ .

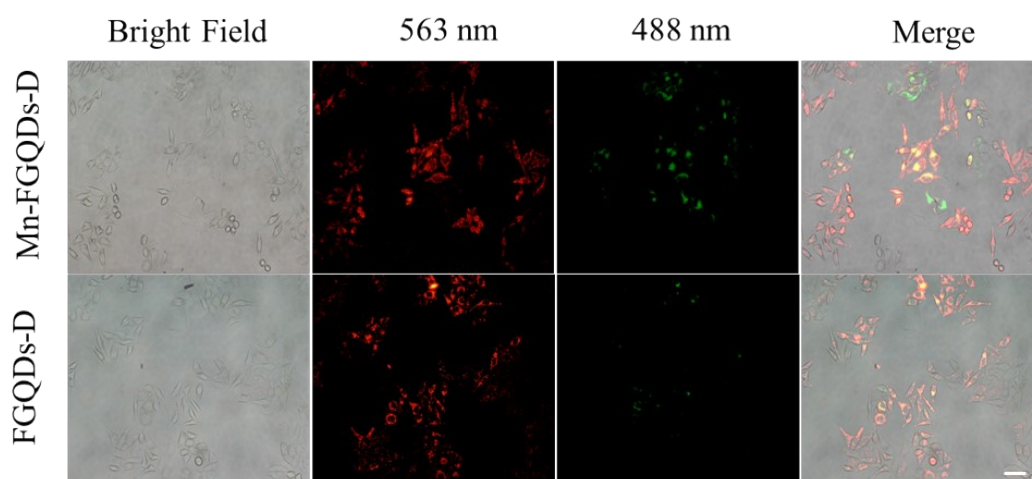

**Figure S14.** CLSM images of living HepG2 cells co-cultured with FGQDs and Mn-FGQDs labelled with JC-1 were taken before LED irradiation (400–500 nm and 65 mW  $\text{cm}^{-2}$ ) for 12 min. Scale bar = 50  $\mu\text{m}$ .



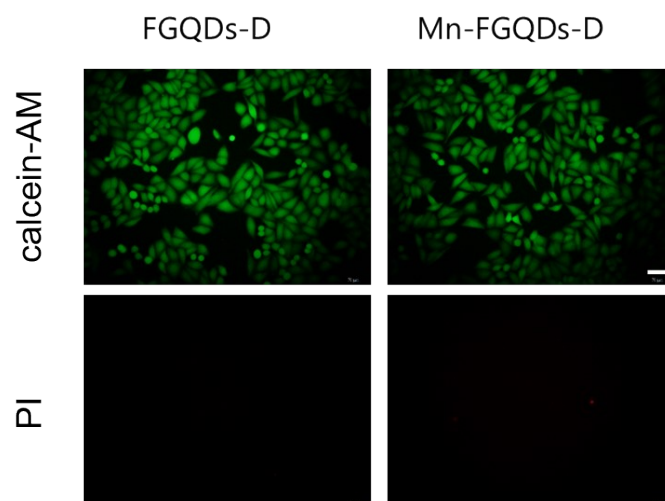

**Figure S15.** Fluorescence images of living HepG2 cells treated with FGQDs and Mn-FGQDs solutions for 4 h and labelled with calcein-AM and of dead cells labelled with PI before LED irradiation (400–500 nm and 65 mW cm<sup>-2</sup>) for 12 min, respectively. Scale bar = 50  $\mu$ m.

**Table S1.** The saturation magnetization ( $M_s$ ) and magnetic coercivity ( $H_c$ ) of FGQDs and Mn-FGQDs at 300 and 5 K.

| T (K)     | FGQDs         |            | Mn-FGQDs      |             |
|-----------|---------------|------------|---------------|-------------|
|           | $M_s$ (emu/g) | $H_c$ (Oe) | $M_s$ (emu/g) | $H_c$ (kOe) |
| 300       | 0.052         | 92.84      | 1.148         | 31.53       |
| <b>77</b> | 0.069         | 33.03      | 1.555         | 29.17       |
